# Supplementary material for: Description of a One-Year Succession of Variants of Interest and Concern of SARS-Cov-2 in Venezuela
Source: Preprints.org preprint supplement (doi:10.20944/preprints202205.0247.v1), 2022-05-19
Supplement: Supplementary file 1 [file Table S1.xlsx]

## Sheet: Sheet1
Alpha VOC		Gamma VOC		Delta VOC		Omicron VOC		Lambda VOI		Mu VOI		Other lineages
Accession	Lineage	Accession	Lineage	Accession	Lineage	Accession	Lineage	Accession	Lineage	Accession	Lineage	Accession	Lineage
EPI_ISL_3281603	B.1.1.7	EPI_ISL_7829670	P.1	EPI_ISL_3298770	B.1.617.2	EPI_ISL_10239574	BA.1	EPI_ISL_3298380	C.37	EPI_ISL_3298687	B.1.621	EPI_ISL_3281604	B.1.1.519
EPI_ISL_3298683	B.1.1.7	EPI_ISL_7829671	P.1	EPI_ISL_6989659	B.1.617.2	EPI_ISL_10239595	BA.1	EPI_ISL_7829512	C.37	EPI_ISL_3298689	B.1.621	EPI_ISL_3281604	B.1.1.351
EPI_ISL_3298684	B.1.1.7	EPI_ISL_7829511	P.1	EPI_ISL_6989661	B.1.617.2	EPI_ISL_10239604	BA.1	EPI_ISL_6989644	C.37	EPI_ISL_3507367	B.1.621	EPI_ISL_3298378	B.1.111
EPI_ISL_3507373	B.1.1.7	EPI_ISL_6988645	P.1	EPI_ISL_6990137	B.1.617.2	EPI_ISL_10239607	BA.1	EPI_ISL_7831415	C.37	EPI_ISL_3507369	B.1.621	EPI_ISL_2628310	B.1.625
EPI_ISL_3507374	B.1.1.7	EPI_ISL_7829513	P.1	EPI_ISL_6990142	B.1.617.2	EPI_ISL_10239608	BA.1	EPI_ISL_7831652	C.37	EPI_ISL_3507370	B.1.621	EPI_ISL_3298386	B.1.1.462
EPI_ISL_3507375	B.1.1.7	EPI_ISL_7829514	P.1	EPI_ISL_8809971	B.1.617.2	EPI_ISL_10239609	BA.1	EPI_ISL_7831996	C.37	EPI_ISL_7829649	B.1.621	EPI_ISL_3298685	B.1.23
EPI_ISL_7829809	B.1.1.7	EPI_ISL_7829547	P.1	EPI_ISL_9377152	B.1.617.2	EPI_ISL_10239610	BA.1	EPI_ISL_9486870	C.37	EPI_ISL_7829658	B.1.621	EPI_ISL_3298764	B.1.111
EPI_ISL_7830812	B.1.1.7	EPI_ISL_7829548	P.1	EPI_ISL_9377159	B.1.617.2	EPI_ISL_10239611	BA.1	EPI_ISL_9486871	C.37	EPI_ISL_6989642	B.1.621	EPI_ISL_3298766	A.2.5
EPI_ISL_7831378	B.1.1.7	EPI_ISL_7829659	P.1	EPI_ISL_9486877	B.1.617.2	EPI_ISL_10239613	BA.1			EPI_ISL_7831126	B.1.621	EPI_ISL_4027141	B.1.625
EPI_ISL_7831382	B.1.1.7	EPI_ISL_7829668	P.1	EPI_ISL_9486884	B.1.617.2	EPI_ISL_10239614	BA.1			EPI_ISL_7831409	B.1.621	EPI_ISL_3298768	A.2.5
EPI_ISL_7831408	B.1.1.7	EPI_ISL_7829672	P.1	EPI_ISL_10239588	B.1.617.2	EPI_ISL_10239642	BA.1			EPI_ISL_9486872	B.1.621	EPI_ISL_9486891	B.1.625
		EPI_ISL_7829673	P.1	EPI_ISL_12437703	B.1.617.2	EPI_ISL_10239646	BA.1			EPI_ISL_9486873	B.1.621
		EPI_ISL_7829808	P.1	EPI_ISL_12437759	B.1.617.2	EPI_ISL_10239649	BA.1			EPI_ISL_6976265	B.1.621
		EPI_ISL_7831127	P.1	EPI_ISL_12437782	B.1.617.2	EPI_ISL_10239653	BA.1			EPI_ISL_9486879	B.1.621
		EPI_ISL_7831128	P.1	EPI_ISL_8804532	AY.3	EPI_ISL_11629602	BA.1			EPI_ISL_6990137	B.1.621
		EPI_ISL_7831129	P.1	EPI_ISL_10239579	AY.5	EPI_ISL_11629603	BA.1			EPI_ISL_6990142	B.1.621
		EPI_ISL_7831169	P.1	EPI_ISL_10239601	AY.5	EPI_ISL_11629604	BA.1			EPI_ISL_9486880	B.1.621
		EPI_ISL_7831361	P.1	EPI_ISL_10239602	AY.5	EPI_ISL_11629608	BA.1			EPI_ISL_9486881	B.1.621
		EPI_ISL_6989672	P.1	EPI_ISL_10239644	AY.5	EPI_ISL_11629610	BA.1			EPI_ISL_9486882	B.1.621
		EPI_ISL_9486869	P.1	EPI_ISL_12437709	AY.5	EPI_ISL_11629616	BA.1			EPI_ISL_9486883	B.1.621
		EPI_ISL_7831410	P.1	EPI_ISL_12437710	AY.5	EPI_ISL_11629621	BA.1			EPI_ISL_9486885	B.1.621
		EPI_ISL_7831411	P.1	EPI_ISL_12437765	AY.5	EPI_ISL_11629624	BA.1			EPI_ISL_9486886	B.1.621
		EPI_ISL_7831412	P.1	EPI_ISL_12437789	AY.5	EPI_ISL_11629631	BA.1			EPI_ISL_9486887	B.1.621
		EPI_ISL_7831413	P.1	EPI_ISL_10239635	AY.20	EPI_ISL_8063663	BA.1.1			EPI_ISL_9486889	B.1.621
		EPI_ISL_7831414	P.1	EPI_ISL_12437716	AY.20	EPI_ISL_8063574	BA.1.1			EPI_ISL_9486890	B.1.621
		EPI_ISL_6973792	P.1	EPI_ISL_9377160	AY.24	EPI_ISL_10239582	BA.1.1			EPI_ISL_10728887	B.1.621
		EPI_ISL_7832122	P.1	EPI_ISL_10728883	AY.24	EPI_ISL_10239591	BA.1.1			EPI_ISL_10728888	B.1.621
		EPI_ISL_6989934	P.1	EPI_ISL_9377157	AY.25	EPI_ISL_10239612	BA.1.1			EPI_ISL_10728889	B.1.621
		EPI_ISL_7832175	P.1	EPI_ISL_9377163	AY.25	EPI_ISL_10239615	BA.1.1			EPI_ISL_10728890	B.1.621
		EPI_ISL_9486874	P.1	EPI_ISL_12437792	AY.25	EPI_ISL_10239616	BA.1.1			EPI_ISL_10728891	B.1.621
		EPI_ISL_9486888	P.1	EPI_ISL_10239647	AY.25.1	EPI_ISL_10239617	BA.1.1			EPI_ISL_8805771	B.1.621
		EPI_ISL_9761344	P.1	EPI_ISL_10239645	AY.25.1	EPI_ISL_10239630	BA.1.1			EPI_ISL_10728892	B.1.621
		EPI_ISL_8810933	P.1	EPI_ISL_10239629	AY.25.1	EPI_ISL_10239640	BA.1.1			EPI_ISL_10728893	B.1.621
		EPI_ISL_9377162	P.1	EPI_ISL_10239618	AY.25.1	EPI_ISL_10239641	BA.1.1			EPI_ISL_10728894	B.1.621
		EPI_ISL_9377164	P.1	EPI_ISL_10239593	AY.25.1	EPI_ISL_10239643	BA.1.1			EPI_ISL_10728902	B.1.621
		EPI_ISL_9377153	P.1	EPI_ISL_10239592	AY.25.1	EPI_ISL_10239648	BA.1.1			EPI_ISL_10728885	B.1.621
		EPI_ISL_10239583	P.1	EPI_ISL_10239590	AY.25.1	EPI_ISL_10239650	BA.1.1			EPI_ISL_10728896	B.1.621
		EPI_ISL_10239619	P.1	EPI_ISL_12437749	AY.25.1	EPI_ISL_10239651	BA.1.1			EPI_ISL_10728908	B.1.621
		EPI_ISL_11629629	P.1	EPI_ISL_12437785	AY.25.1	EPI_ISL_10239652	BA.1.1			EPI_ISL_10728900	B.1.621
		EPI_ISL_11629630	P.1	EPI_ISL_12437787	AY.25.1	EPI_ISL_10239654	BA.1.1			EPI_ISL_10728897	B.1.621
		EPI_ISL_11629633	P.1	EPI_ISL_12437788	AY.25.1	EPI_ISL_11629605	BA.1.1			EPI_ISL_10728901	B.1.621
		EPI_ISL_12437701	P.1	EPI_ISL_12437790	AY.25.1	EPI_ISL_11629606	BA.1.1			EPI_ISL_10728898	B.1.621
		EPI_ISL_12437702	P.1	EPI_ISL_12437791	AY.25.1	EPI_ISL_11629607	BA.1.1			EPI_ISL_10728886	B.1.621
		EPI_ISL_12437705	P.1	EPI_ISL_11629632	AY.26	EPI_ISL_11629609	BA.1.1			EPI_ISL_10728906	B.1.621
		EPI_ISL_12437712	P.1	EPI_ISL_10728875	AY.26	EPI_ISL_11629611	BA.1.1			EPI_ISL_10728899	B.1.621
		EPI_ISL_12437715	P.1	EPI_ISL_8805061	AY.33	EPI_ISL_11629612	BA.1.1			EPI_ISL_9396353	B.1.621
		EPI_ISL_12437720	P.1	EPI_ISL_10239586	AY.42	EPI_ISL_11629613	BA.1.1			EPI_ISL_9396352	B.1.621
		EPI_ISL_12437724	P.1	EPI_ISL_10239600	AY.42	EPI_ISL_11629614	BA.1.1			EPI_ISL_9396358	B.1.621
		EPI_ISL_12437728	P.1	EPI_ISL_6989445	AY.43	EPI_ISL_11629615	BA.1.1			EPI_ISL_9396351	B.1.621
		EPI_ISL_12437729	P.1	EPI_ISL_8809951	AY.43	EPI_ISL_11629617	BA.1.1			EPI_ISL_9396356	B.1.621
		EPI_ISL_12437737	P.1	EPI_ISL_9377154	AY.43	EPI_ISL_11629618	BA.1.1			EPI_ISL_9345658	B.1.621
		EPI_ISL_12437738	P.1	EPI_ISL_9377161	AY.43	EPI_ISL_11629619	BA.1.1			EPI_ISL_9396359	B.1.621
		EPI_ISL_12437742	P.1	EPI_ISL_9486875	AY.43	EPI_ISL_11629620	BA.1.1			EPI_ISL_10239573	B.1.621
		EPI_ISL_12437745	P.1	EPI_ISL_9486876	AY.43	EPI_ISL_11629622	BA.1.1			EPI_ISL_10239575	B.1.621
				EPI_ISL_9486878	AY.43	EPI_ISL_11629623	BA.1.1			EPI_ISL_9763927	B.1.621
				EPI_ISL_10239605	AY.43	EPI_ISL_11629625	BA.1.1			EPI_ISL_10239576	B.1.621
				EPI_ISL_10239606	AY.43	EPI_ISL_11629626	BA.1.1			EPI_ISL_10239620	B.1.621
				EPI_ISL_10239633	AY.43	EPI_ISL_11629627	BA.1.1			EPI_ISL_10239621	B.1.621
				EPI_ISL_10728871	AY.43	EPI_ISL_11629634	BA.1.1			EPI_ISL_10239636	B.1.621
				EPI_ISL_10728873	AY.43	EPI_ISL_11629635	BA.1.1			EPI_ISL_10239637	B.1.621
				EPI_ISL_10728880	AY.43					EPI_ISL_10239638	B.1.621
				EPI_ISL_10728903	AY.43					EPI_ISL_11629596	B.1.621
				EPI_ISL_11629591	AY.43					EPI_ISL_11629597	B.1.621
				EPI_ISL_12437706	AY.43					EPI_ISL_11629599	B.1.621
				EPI_ISL_12437713	AY.43					EPI_ISL_11629600	B.1.621
				EPI_ISL_12437717	AY.43					EPI_ISL_11629601	B.1.621
				EPI_ISL_12437718	AY.43					EPI_ISL_12437708	B.1.621
				EPI_ISL_12437730	AY.43					EPI_ISL_12437719	B.1.621
				EPI_ISL_12437733	AY.43					EPI_ISL_12437721	B.1.621
				EPI_ISL_12437734	AY.43					EPI_ISL_12437722	B.1.621
				EPI_ISL_12437744	AY.43					EPI_ISL_12437723	B.1.621
				EPI_ISL_12437750	AY.43					EPI_ISL_12437731	B.1.621
				EPI_ISL_12437754	AY.43					EPI_ISL_12437732	B.1.621
				EPI_ISL_12437755	AY.43					EPI_ISL_12437735	B.1.621
				EPI_ISL_12437756	AY.43					EPI_ISL_12437736	B.1.621
				EPI_ISL_12437764	AY.43					EPI_ISL_12437739	B.1.621
				EPI_ISL_12437768	AY.43					EPI_ISL_12437740	B.1.621
				EPI_ISL_12437770	AY.43					EPI_ISL_12437741	B.1.621
				EPI_ISL_12437771	AY.43					EPI_ISL_12437743	B.1.621
				EPI_ISL_12437772	AY.43					EPI_ISL_12437746	B.1.621
				EPI_ISL_12437773	AY.43					EPI_ISL_12437747	B.1.621
				EPI_ISL_12437774	AY.43					EPI_ISL_12437776	B.1.621
				EPI_ISL_12437775	AY.43
				EPI_ISL_12437778	AY.43
				EPI_ISL_12437779	AY.43
				EPI_ISL_10239603	AY.44
				EPI_ISL_9345977	AY.44
				EPI_ISL_10728879	AY.44
				EPI_ISL_10728878	AY.44
				EPI_ISL_12437704	AY.44
				EPI_ISL_12437751	AY.44
				EPI_ISL_11629594	AY.100
				EPI_ISL_10239632	AY.100
				EPI_ISL_10239631	AY.100
				EPI_ISL_10239584	AY.103
				EPI_ISL_8804697	AY.122
				EPI_ISL_8806248	AY.122
				EPI_ISL_8806397	AY.122
				EPI_ISL_8806733	AY.122
				EPI_ISL_8808443	AY.122
				EPI_ISL_8808444	AY.122
				EPI_ISL_8808609	AY.122
				EPI_ISL_8810347	AY.122
				EPI_ISL_9377156	AY.122
				EPI_ISL_9377158	AY.122
				EPI_ISL_9377165	AY.122
				EPI_ISL_9377166	AY.122
				EPI_ISL_9377167	AY.122
				EPI_ISL_9396354	AY.122
				EPI_ISL_11629590	AY.122
				EPI_ISL_10239577	AY.122
				EPI_ISL_10239578	AY.122
				EPI_ISL_10239581	AY.122
				EPI_ISL_10239585	AY.122
				EPI_ISL_10239587	AY.122
				EPI_ISL_10239589	AY.122
				EPI_ISL_10239596	AY.122
				EPI_ISL_10239597	AY.122
				EPI_ISL_10239598	AY.122
				EPI_ISL_10239599	AY.122
				EPI_ISL_10239623	AY.122
				EPI_ISL_10239624	AY.122
				EPI_ISL_10239625	AY.122
				EPI_ISL_10239626	AY.122
				EPI_ISL_10239627	AY.122
				EPI_ISL_10239628	AY.122
				EPI_ISL_10239634	AY.122
				EPI_ISL_10239639	AY.122
				EPI_ISL_10728870	AY.122
				EPI_ISL_10728872	AY.122
				EPI_ISL_10728874	AY.122
				EPI_ISL_10728876	AY.122
				EPI_ISL_10728881	AY.122
				EPI_ISL_10728882	AY.122
				EPI_ISL_10728904	AY.122
				EPI_ISL_10728907	AY.122
				EPI_ISL_10239580	AY.122
				EPI_ISL_11629589	AY.122
				EPI_ISL_11629592	AY.122
				EPI_ISL_12437707	AY.122
				EPI_ISL_12437711	AY.122
				EPI_ISL_12437725	AY.122
				EPI_ISL_12437726	AY.122
				EPI_ISL_12437727	AY.122
				EPI_ISL_12437748	AY.122
				EPI_ISL_12437752	AY.122
				EPI_ISL_12437753	AY.122
				EPI_ISL_12437757	AY.122
				EPI_ISL_12437758	AY.122
				EPI_ISL_12437760	AY.122
				EPI_ISL_12437763	AY.122
				EPI_ISL_12437766	AY.122
				EPI_ISL_12437767	AY.122
				EPI_ISL_12437777	AY.122
				EPI_ISL_12437780	AY.122
				EPI_ISL_12437781	AY.122
				EPI_ISL_12437783	AY.122
				EPI_ISL_12437784	AY.122
				EPI_ISL_12437786	AY.122
				EPI_ISL_12437794	AY.122
				EPI_ISL_11629593	AY.122.4
				EPI_ISL_11629595	AY.122.4
				EPI_ISL_11629598	AY.122.4
				EPI_ISL_10239622	AY.122.4
				EPI_ISL_12437714	AY.122.4
				EPI_ISL_12437761	AY.122.4
				EPI_ISL_12437762	AY.122.4
				EPI_ISL_12437769	AY.122.4
				EPI_ISL_12437793	AY.122.4
				EPI_ISL_10239594	AY.127
